# Supplementary material
Source: PubMed Central journal article supplement (PMC4530746)
Supplement: SD5.pdf [file SD5.pdf]

SUPPLEMENTAL TABLE 1

Pearson correlation coefficient for environmental conditions and household demographic characteristics ( $N = 216$  children)

|                                              | Animal corral<br>in sleeping<br>room | Caregiver<br>with visibly<br>soiled hands* | Child<br>with visibly<br>soiled hands* | Unimproved<br>sanitation<br>option† | No soap<br>present near<br>tubewell‡ | Earth floor<br>in sleeping<br>room | Caregiver<br>educational<br>level | Number of<br>individuals living<br>in household |
|----------------------------------------------|--------------------------------------|--------------------------------------------|----------------------------------------|-------------------------------------|--------------------------------------|------------------------------------|-----------------------------------|-------------------------------------------------|
| Animal corral in sleeping room               | 1.00                                 | 0.05                                       | 0.09§                                  | -0.07                               | 0.08                                 | 0.20¶                              | -0.05                             | -0.07                                           |
| Caregiver with visibly soiled hands*         | -                                    | 1.00                                       | 0.33¶                                  | 0.00                                | 0.04                                 | -0.03                              | 0.05                              | 0.02                                            |
| Child with visibly soiled hands*             | -                                    | -                                          | 1.00                                   | 0.14¶                               | 0.11§                                | 0.13¶                              | 0.01                              | 0.00                                            |
| Unimproved sanitation option†                | -                                    | -                                          | -                                      | 1.00                                | 0.16¶                                | 0.18¶                              | -0.15¶                            | -0.11§                                          |
| No soap present near tubewell‡               | -                                    | -                                          | -                                      | -                                   | 1.00                                 | 0.25¶                              | -0.20¶                            | -0.01                                           |
| Earth floor in sleeping room                 | -                                    | -                                          | -                                      | -                                   | -                                    | 1.00                               | -0.28¶                            | -0.15¶                                          |
| Caregiver educational level                  | -                                    | -                                          | -                                      | -                                   | -                                    | -                                  | 1.00                              | 0.08                                            |
| Number of individuals living<br>in household | -                                    | -                                          | -                                      | -                                   | -                                    | -                                  | -                                 | 1.00                                            |

\*Visibly soiled hands was defined as an individual with a code of visible dirt for all parts of the hand (e.g., finger pads, nails, palms).

†Unimproved sanitation (defined as no sanitation option, open-pit latrine, latrine with broken slab, bucket, or hanging toilet).

‡Near is defined as within ten steps of the tubewell.

§ $P$  value < 0.20.¶ $P$  value < 0.05.
